# Supplementary material for: Nosocomial Outbreak of Extensively Drug-Resistant (Polymyxin B and Carbapenem) Klebsiella pneumoniae in a Collapsed University Hospital Due to COVID-19 Pandemic
Source: MDPI journal article supplement (doi:10.3390/antibiotics11060814), 2022-06-17
Supplement: s1 [file s1]

# Nosocomial Outbreak of Extensively Drug-Resistant (Polymyxin B and Carbapenem) *Klebsiella pneumoniae* in a Collapsed University Hospital Due to COVID-19 Pandemic

Gilberto G. Gaspar <sup>1,\*†</sup>, Gustavo Tamasco <sup>1,†</sup>, Nathália Abichabki <sup>2,†</sup>, Ana Flavia T. Scaranello <sup>3</sup>, Maria Auxiliadora-Martins <sup>4</sup>, Renata Pocente <sup>4</sup>, Leonardo N. Andrade <sup>2</sup>, María-Eugenia Guazzaroni <sup>3</sup>, Rafael Silva-Rocha <sup>1</sup>, Valdes R. Bollela <sup>1</sup>

<sup>1</sup> Ribeirão Preto School of Medicine (FMRP), University of São Paulo (USP), Av. Bandeirantes 3900, Ribeirão Preto, SP 14049-900, Brazil  
gustavo.tamasco@usp.br (G.T.); silvarochar@usp.br (R.S.-R.); vbollela@fmrp.usp.br (V.R.B.)

<sup>2</sup> School of Pharmaceutical Sciences of Ribeirão Preto (FCFRP), University of São Paulo (USP), Av. Bandeirantes 3900, Ribeirão Preto, SP 14049-900, Brazil;  
nathalia.abichabki@alumni.usp.br (N.A.); leonardo@fcrp.usp.br (L.N.A.)

<sup>3</sup> Faculty of Philosophy, Sciences and Letters of Ribeirão Preto (FFCLRP), University of São Paulo (USP), Av. Bandeirantes 3900, Ribeirão Preto, SP 14049-900, Brazil; anatonelli@usp.br (A.F.T.S.); meguazzaroni@ffclrp.usp.br (M.-E.G.)

<sup>4</sup> Clinics and University Hospital from Ribeirão Preto School of Medicine (FMRP), University of São Paulo (USP), Av. Bandeirantes 3900, Ribeirão Preto, SP 14049-900, Brazil; mamartins@hcrp.usp.br (M.A.-M.); rhcpocente@hcrp.usp.br (R.P.)

\* Correspondence: ggaspar@hcrp.usp.br; Tel.: +55-(16)-981272799

† These authors contributed equally to this work.

## **Supplementary Methods**

### *Parameter used for genome assemble and evaluation*

Bowtie2 was used to align sequencing reads to long reference sequences with the following parameters: -D 20 -R 3 -N 1 -L 20 very-sensitive-local. The resulting reads were assembled using Spades with parameter -k 21, 33, 57, 77, 99, 127 -merge. After the annotation step performed by Prokka, all genes were aligned to NDARO using Diamond with the parameters blastx -k 5 -f 6 -Evalue 0.001.

## Supplementary Tables

**Table S1.** Antibiotic resistance profile of 26 PB- and carbapenem-resistant *K. pneumoniae* isolated from clinical patients during COVID-19 outbreak

| Strain ID | PB    | TGC | AMP | SAM | PTZ  | CRX | CRO | CAZ  | CPM | ATM | ERT | IPM | MER | CZA   | GEN | AMI | CL  | CIP | SXT     |
|-----------|-------|-----|-----|-----|------|-----|-----|------|-----|-----|-----|-----|-----|-------|-----|-----|-----|-----|---------|
| L01       | 16,0  | 1,0 | >32 | >32 | >128 | >64 | >64 | 16,0 | >64 | >32 | >8  | >16 | >16 | 0.75  | >16 | >64 | >64 | >4  | >320    |
| L02       | 256,0 | 1,0 | >32 | >32 | >128 | >64 | >64 | >64  | >64 | >32 | >8  | >16 | >16 | 1,0   | >16 | >64 | >64 | >4  | >16:304 |
| L03       | 64,0  | 1,0 | >32 | >32 | >128 | >64 | >64 | >64  | >64 | >32 | >8  | >16 | >16 | 1,0   | >16 | >64 | >64 | >4  | >320    |
| L04       | ≤0,5  | >8  | >32 | >32 | >128 | >64 | >64 | >64  | >64 | >32 | >8  | 2,0 | 8,0 | nd    | ≤1  | 8   | >64 | >4  | >16:304 |
| L05       | 8,0   | 2,0 | >32 | >32 | >128 | >64 | >64 | >64  | >64 | >32 | >8  | >16 | >16 | 1,0   | >16 | >64 | >64 | >4  | >16:304 |
| L06       | 32,0  | 2,0 | >32 | >32 | >128 | >64 | >64 | 16,0 | >64 | >32 | >8  | 8,0 | >16 | 1,0   | >16 | >64 | >64 | >4  | >16:304 |
| L09       | 32,0  | 2,0 | >32 | >32 | >128 | >64 | >64 | >64  | >64 | >32 | >8  | >16 | >16 | 1,0   | >16 | >64 | >64 | >4  | >16:304 |
| L10       | nd    | nd  | >32 | >32 | >128 | >64 | >64 | >64  | >64 | nd  | >8  | >16 | >16 | nd    | >16 | >64 | nd  | >4  | nd      |
| L11       | 32,0  | 2,0 | >32 | >32 | >128 | >64 | >64 | >64  | >64 | >32 | >8  | >16 | >16 | 0.016 | >16 | >64 | >64 | >4  | >16:304 |
| L12       | 2,0   | 0.5 | >32 | >32 | >128 | >64 | >64 | >64  | >64 | >32 | >8  | >16 | >16 | 256,0 | >16 | >64 | >64 | >4  | >16:304 |
| L13       | 32,0  | 1,0 | >32 | >32 | >128 | >64 | >64 | >64  | >64 | >32 | >8  | 1,0 | 4,0 | nd    | >16 | 32  | 64  | >4  | >16:304 |
| L14       | 16,0  | 2,0 | >32 | >32 | >128 | >64 | >64 | 32,0 | >64 | >32 | >8  | >16 | >16 | 1,0   | >16 | >64 | >64 | >4  | >16:304 |
| L15       | 4,0   | 2,0 | >32 | >32 | >128 | >64 | >64 | >64  | >64 | >32 | >8  | >16 | >16 | 1,0   | >16 | >64 | >64 | >4  | >16:304 |
| L16       | 4,0   | 4,0 | >32 | >32 | >128 | >64 | >64 | >64  | >64 | >32 | >8  | >16 | >16 | 1,0   | >16 | >64 | >64 | >4  | >16:304 |
| L17       | 64,0  | 8,0 | >32 | >32 | >128 | >64 | >64 | >64  | >64 | >32 | >8  | >16 | >16 | S     | >16 | 8   | 32  | >4  | >16:304 |
| L18       | 64,0  | 2,0 | >32 | >32 | >128 | >64 | >64 | >64  | >64 | >32 | >8  | >16 | >16 | 1.5   | >16 | >64 | >64 | >4  | >16:304 |
| L19       | 16,0  | 2,0 | >32 | >32 | >128 | >64 | >64 | >64  | >64 | >32 | >8  | >16 | >16 | S     | ≤1  | 4   | 16  | >4  | >16:304 |
| L20       | 8,0   | 1,0 | >32 | >32 | >128 | >64 | >64 | >64  | >64 | >32 | >8  | >16 | >16 | S     | >16 | >64 | >64 | >4  | >16:304 |
| L24       | ≤0,5  | 2,0 | >32 | >32 | >128 | >64 | >64 | >64  | >64 | >32 | >8  | >16 | >16 | 0.5   | >16 | >64 | >64 | >4  | >16:304 |
| L26       | 128   | 4,0 | >32 | >32 | >128 | >64 | >64 | >64  | >64 | >32 | >8  | >16 | >16 | 0.25  | ≤1  | 16  | 32  | >4  | >16:304 |
| L27       | 2     | 2,0 | >32 | >32 | >128 | >64 | >64 | >64  | >64 | >32 | >8  | >16 | >16 | 1.5   | >16 | >64 | >64 | >4  | >16:304 |

|     |       |     |     |     |      |     |     |     |     |     |    |     |     |      |     |     |     |    |         |
|-----|-------|-----|-----|-----|------|-----|-----|-----|-----|-----|----|-----|-----|------|-----|-----|-----|----|---------|
| L28 | 256   | 1,0 | >32 | >32 | >128 | >64 | >64 | >64 | >64 | >32 | >8 | >16 | >16 | 1.5  | >16 | 16  | 64  | >4 | >16:304 |
| L30 | <=0,5 | 0.5 | >32 | >32 | >128 | >64 | >64 | >64 | >64 | >32 | >8 | >16 | >16 | 0.5  | >16 | >64 | >64 | >4 | >16:304 |
| L31 | 8     | 2,0 | >32 | >32 | >128 | >64 | >64 | >64 | >64 | >32 | >8 | >16 | >16 | 1,0  | >16 | >64 | >64 | >4 | >16:304 |
| L33 | 8     | 2,0 | >32 | >32 | >128 | >64 | >64 | >64 | >64 | >32 | >8 | >16 | >16 | 0.75 | >16 | >64 | >64 | >4 | >16:304 |
| L34 | 32    | 4,0 | >32 | >32 | >128 | >64 | >64 | >64 | >64 | >32 | >8 | >16 | >16 | 1,0  | >16 | 16  | 16  | >4 | >16:304 |

Minimal inhibitory concentration is indicated in µg/mL. Red indicates resistance to the antibiotic, orange indicates susceptibility with increased exposure to antibiotic (previously intermediate category), and green indicates susceptible to antibiotic. Nd: not determined; S: susceptible, determined by disk-diffusion method; PB: Polymyxin B; TGC: Tigecycline; AMP: Ampicillin; SAM: Ampicillin+Sulbactam; PTZ: Piperacillin+Tazobactam; CRX: Cefuroxime; CRO: Ceftriaxone; CAZ: Ceftazidime; CPM: Cefepime; ERT: Ertapenem; IPM: Imipenem; MER: Meropenem; CZA: Ceftazidime/Avibactam; GEN: Gentamicin; AMI: Amikacin; NAL: Nalidixic acid; NOR: Norfloxacin; CIP: Ciprofloxacin; SXT: Trimethoprim Sulfamethoxazole.

**Table S2.** Acquired genes conferring resistance to beta-lactams, tetracyclines, aminoglycosides, fosfomicin, and fluoroquinolones found in the isolates genome.

| Strain ID | Acquired resistance genes                  |                                            |                                                                                                                                             |            |                              |
|-----------|--------------------------------------------|--------------------------------------------|---------------------------------------------------------------------------------------------------------------------------------------------|------------|------------------------------|
|           | Beta-lactams ( <i>bla</i> )                | Tetracyclines                              | Aminoglycosides                                                                                                                             | Fosfomicyn | Fluoroquinolones             |
| L14       | KPC-2; SHV-11; CTX-M-14                    | <i>tetG</i> ; <i>tetR(G)</i>               | <i>rmtB</i> ; <i>aac3-IId</i> ; <i>aac3-Ib</i> ; <i>aadA2</i>                                                                               | nd         | nd                           |
| L03       | KPC-2; SHV-11; CTX-M-14                    | <i>tetG</i> ; <i>tetR(G)</i>               | <i>rmtB</i> ; <i>aac3-IId</i> ; <i>aac3-Ib</i> ; <i>aadA2</i>                                                                               | nd         | nd                           |
| L13       | SHV-11; CTX-M-15                           | nd                                         | <i>aac3-IIa</i> ; <i>aac3-Ib</i> ; <i>ant3''Th-aac6-IId</i> ; <i>aac3-Ib</i> ; <i>aac3-Ib</i>                                               | nd         | <i>qnrB1</i>                 |
| L11       | KPC-2; SHV-11; CTX-M-14                    | <i>tetG</i> ; <i>tetR(G)</i>               | <i>rmtB</i> ; <i>aac3-IId</i> ; <i>aac3-Ib</i> ; <i>aadA2</i>                                                                               | nd         | nd                           |
| L10       | KPC-2; SHV-11; CTX-M-14                    | <i>tetG</i> ; <i>tetR(G)</i>               | <i>rmtB</i> ; <i>aac3-IId</i> ; <i>aac3-Ib</i> ; <i>aadA2</i>                                                                               | nd         | nd                           |
| L30       | KPC-2; SHV-11; CTX-M-14                    | <i>tetG</i> ; <i>tetR(G)</i>               | <i>rmtB</i> ; <i>aac3-IId</i> ; <i>aac3-Ib</i> ; <i>aadA2</i>                                                                               | nd         | nd                           |
| L09       | KPC-2; SHV-11; CTX-M-14                    | <i>tetG</i> ; <i>tetR(G)</i>               | <i>rmtB</i> ; <i>aac3-IId</i> ; <i>aac3-Ib</i> ; <i>aadA2</i>                                                                               | nd         | nd                           |
| L05       | KPC-2; SHV-11; CTX-M-14                    | <i>tetG</i> ; <i>tetR(G)</i>               | <i>rmtB</i> ; <i>aac3-IId</i> ; <i>aac3-Ib</i> ; <i>aadA2</i>                                                                               | nd         | nd                           |
| L31       | KPC-2; SHV-11; CTX-M-14                    | <i>tetG</i> ; <i>tetR(G)</i>               | <i>rmtB</i> ; <i>aac3-IId</i> ; <i>aac3-Ib</i> ; <i>aadA2</i>                                                                               | nd         | nd                           |
| L15       | KPC-2; SHV-11; CTX-M-14                    | <i>tetG</i> ; <i>tetR(G)</i>               | <i>rmtB</i> ; <i>aac3-IId</i> ; <i>aac3-Ib</i> ; <i>aadA2</i>                                                                               | nd         | nd                           |
| L01       | KPC-2; SHV-11; CTX-M-14                    | <i>tetG</i> ; <i>tetR(G)</i>               | <i>rmtB</i> ; <i>aac3-IId</i> ; <i>aac3-Ib</i> ; <i>aadA2</i>                                                                               | nd         | nd                           |
| L06       | KPC-2; SHV-11; CTX-M-14                    | <i>tetG</i> ; <i>tetR(G)</i>               | <i>rmtB</i> ; <i>aac3-IId</i> ; <i>aac3-Ib</i> ; <i>aac6-Ib</i> ; <i>aadA2</i>                                                              | nd         | nd                           |
| L12       | KPC-2; SHV-11; CTX-M-14                    | <i>tetG</i> ; <i>tetR(G)</i>               | <i>rmtB</i> ; <i>aac3-IId</i> ; <i>aac3-Ib</i> ; <i>aadA2</i>                                                                               | nd         | nd                           |
| L02       | KPC-2; SHV-11; CTX-M-14                    | <i>tetG</i> ; <i>tetR(G)</i>               | <i>rmtB</i> ; <i>aac3-IId</i> ; <i>aac3-Ib</i> ; <i>aadA2</i>                                                                               | nd         | nd                           |
| L04       | SHV-11; CTX-M-66; CTX-M-15                 | nd                                         | <i>ant3''Th-aac6-IId</i> ; <i>aac3-Ib</i>                                                                                                   | nd         | nd                           |
| L34       | KPC-2; SHV-11; CTX-M-15                    | <i>tetG</i> ; <i>tetR(G)</i>               | <i>aac3-Ib</i> ; <i>ant3''Th-aac6-IId</i> ; <i>aadA2</i>                                                                                    | nd         | <i>qnrB1</i>                 |
| L18       | KPC-2; SHV-11; CTX-M-14                    | <i>tetG</i> ; <i>tetR(G)</i>               | <i>rmtB</i> ; <i>aac3-IId</i> ; <i>aac3-Ib</i> ; <i>aadA2</i>                                                                               | nd         | nd                           |
| L33       | KPC-2; SHV-11; CTX-M-14                    | <i>tetG</i> ; <i>tetR(G)</i>               | <i>rmtB</i> ; <i>aac3-IId</i> ; <i>aac3-Ib</i> ; <i>aadA2</i>                                                                               | nd         | nd                           |
| L16       | KPC-2; SHV-11; CTX-M-14                    | <i>tetR(G)</i> ; <i>tetG</i>               | <i>rmtB</i> ; <i>aac3-IId</i> ; <i>aac3-Ib</i> ; <i>aadA2</i>                                                                               | nd         | nd                           |
| L27       | KPC-2; SHV-11; CTX-M-14; CTX-M-8           | <i>tetG</i> ; <i>tetR(G)</i>               | <i>rmtB</i> ; <i>aac3-IId</i> ; <i>aac3-Ib</i> ; <i>aac6-Ib</i> ; <i>aadA2</i>                                                              | nd         | <i>qnrB42</i>                |
| L24       | KPC-2; SHV-11; CTX-M-14                    | <i>tetG</i> ; <i>tetR(G)</i>               | <i>rmtB</i> ; <i>aac3-IId</i> ; <i>aac3-Ib</i> ; <i>aadA2</i>                                                                               | nd         | nd                           |
| L26       | KPC-2; SHV-11; CTX-M-15                    | nd                                         | <i>ant3''Th-aac6-IId</i> ; <i>aadA2</i>                                                                                                     | nd         | <i>qnr-S1</i>                |
| L28       | KPC-2; SHV-11; CTX-M-15; CTX-M-14; CTX-M-8 | <i>tetG</i> ; <i>tetR(G)</i> ; <i>tetD</i> | <i>rmtB</i> ; <i>aac3-IId</i> ; <i>aac3-Ib</i> ; <i>aac6-Ib</i> ; <i>aadA1</i> ; <i>aadA2</i> ; <i>ant3''Th-aac6-IId</i> ; <i>aac6Ib-cr</i> | nd         | <i>qnrB1</i> ; <i>qnrB42</i> |
| L17       | KPC-2; SHV-11; CTX-M-15                    | <i>tetR</i> ; <i>tetA</i>                  | <i>aac3-Ib</i> ; <i>ant3''Th-aac6-IId</i> ; <i>aac3-IIa</i> ; <i>aadA2</i>                                                                  | nd         | nd                           |

|     |                          |                      |                                          |             |    |
|-----|--------------------------|----------------------|------------------------------------------|-------------|----|
| L19 | KPC-2; SHV-145; CTX-M-15 | <i>tetR; tetA</i>    | <i>aac3-Ib; ant3''Ih-aac6-Iid; aadA2</i> | <i>fosA</i> | nd |
| L20 | KPC-2; SHV-11; CTX-M-14  | <i>tetG; tetR(G)</i> | <i>rmtB; aac3-IIId; aac3-Ib; aadA2</i>   | nd          | nd |

nd: not determined

## Supplementary Figures

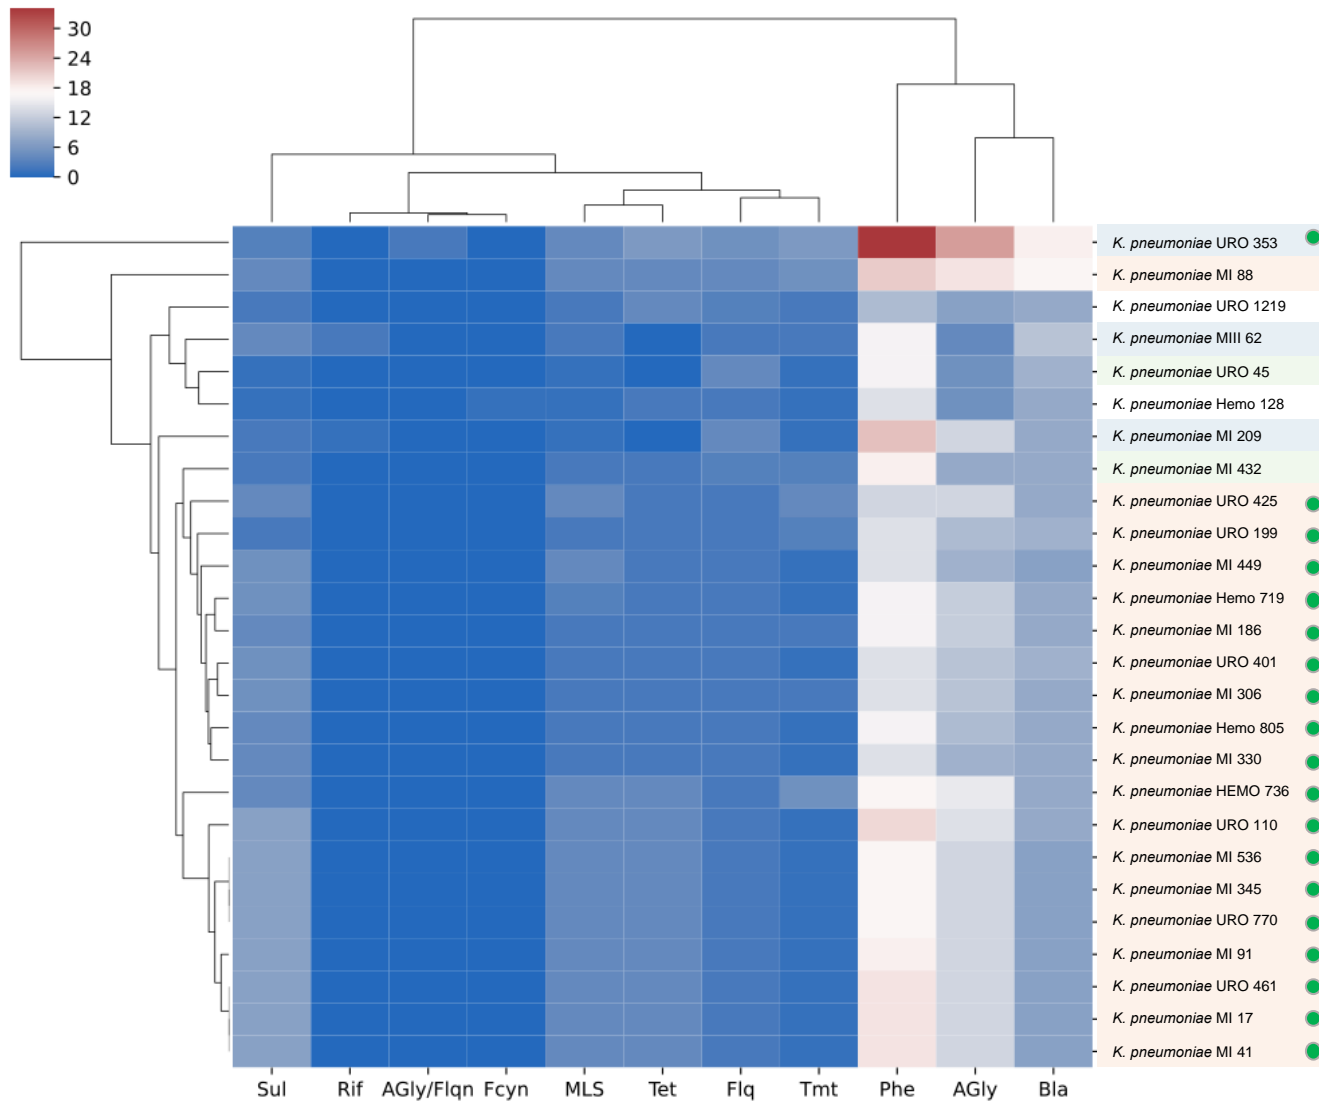

**Figure S1.** Heatmap showing the presence of ARGs identified by ARG-ANNOT indicating the number of each resistance gene per genome. Data were clustered using hierarchical mapping with Euclidian distance. Blue to red scale indicates number of ARG for each strain in each category, as indicated in the legend. The nucleotide sequences in ARG-ANNOT from different antibiotics are abbreviated as follows: AGly, aminoglycosides resistance genes; Bla, beta-lactamases; Fcyn, fosfomycin; Flq, fluoroquinolones; Gly, glycopeptides; MLS, macrolide-lincosamide-streptogramin; Phe, phenicols; Rif, rifampin; Sul, sulfonamides; Tet, tetracyclines; and Tmt, trimethoprim. Bacteria holding plasmid pkP98M3N42 with coverage scores over 90% and similarity scores over 99% with the reference are indicated with a green solid circle.

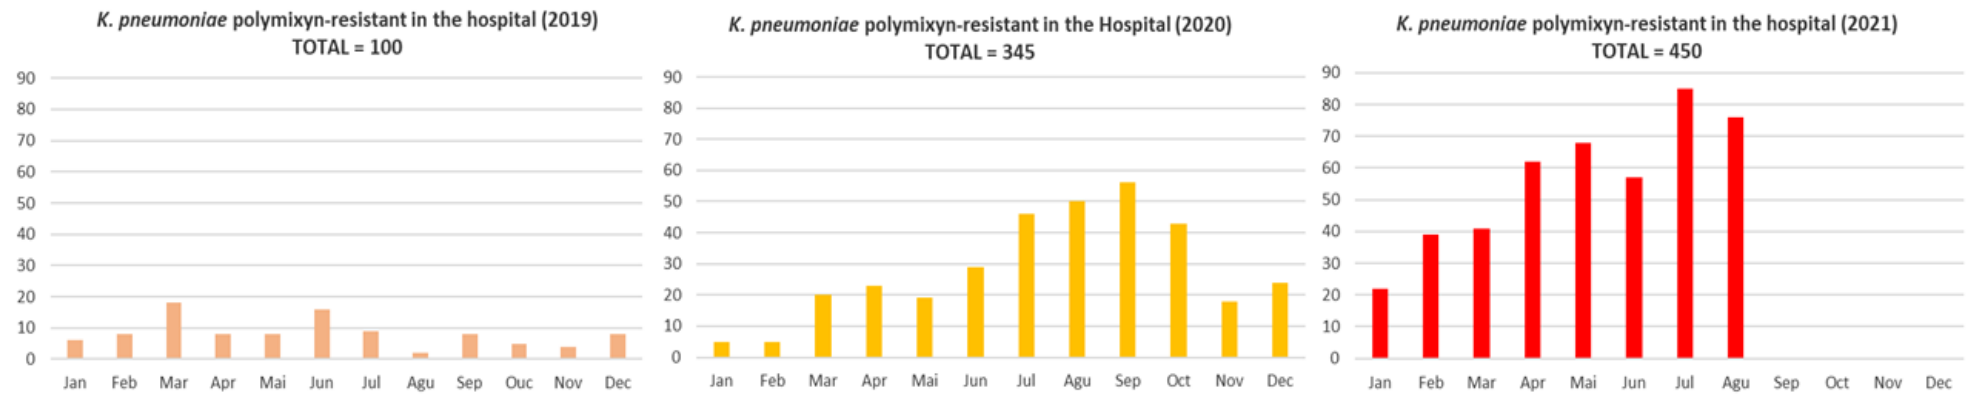

**Figure S2.** Number of *Klebsiella pneumoniae* isolates resistant to polymyxin and carbapenem in the Ribeirão Preto Clinics Hospital in 2019, 2020 and 2021 (Jan-Aug). Many patients had more than one isolate identified with the same drug-susceptibility profile. In 2021 there were 3.5 times more drug-resistant isolates than in 2019. During 2020 and 2021 the increment was quite related to the healthcare system collapse due to COVID-19 pandemic.
